# Supplementary material for: Biochemical and Molecular Characterization of the Rice Chalcone Isomerase Family
Source: MDPI journal article supplement (doi:10.3390/plants10102064), 2021-09-30
Supplement: s1 [file s1]

Table S1. Amino acid homology of OsCHIs and *bona fide* CHIs. Value represent the percentage of amino acid identity.

[illegible]

Table S2. Primer sequences and PCR conditions for *OsCHI* cloning. <sup>1</sup>

| Gene                       | Primer sequence                                                          | Annealing Temp. (°C) |
|----------------------------|--------------------------------------------------------------------------|----------------------|
| OsCHI1<br>(LOC_Os02g21520) | 5'-GGCATATGAGCGCGGTGCCCCGTCGT-3'<br>5'-CCGAATTCTCACTTTGTAAGAATAGCCT-3'   | 58                   |
| OsCHI2<br>(LOC_Os02g53810) | 5'-CCGCTAGCATGAAACCGGACTGGTCAAT-3'<br>5'-CCGAATTCTCAATAACATCTTCTAATGA-3' | 58                   |
| OsCHI3<br>(LOC_Os03g60509) | 5'-GGCATATGGCGGCCGTGTCTCGGAGGT-3'<br>5'-CCGAATTCTCACGCGGACACCGGCGC-3'    | 56                   |
| OsCHI4<br>(LOC_Os06g10210) | 5'-GGCATATGAAGGCCGATCGGTAAAT-3'<br>5'-CCGAATTCTCATGGACAGTGATCCAAGT-3'    | 58                   |
| OsCHI5<br>(LOC_Os07g38390) | 5'-GGCATATGGTCTCCCTCCGCTTCCC-3'<br>5'-CCGAATTCTCAGTTCTTAAGAATAGAAG-3'    | 58                   |
| OsCHI6<br>(LOC_Os11g02440) | 5'-GGCATATGTACTGTGCAGTGGGCAC-3'<br>5'-CCGGATCCTCATGCAGAGAGCAGTGCTG-3'    | 58                   |
| OsCHI7<br>(LOC_Os12g02370) | 5'-GGCATATGGCCACCGTGGAGGTGGA-3'<br>5'-CCGGATCCTCATGCAGAGAGCAGTGCTG-3'    | 58                   |

<sup>1</sup> Restriction sites are underlined.

Table S3. Primer sequences and PCR conditions for quantitative real-time PCR analysis.

| Gene                       | Primer sequence                                                | Annealing Temp. (°C) |
|----------------------------|----------------------------------------------------------------|----------------------|
| OsCHI1<br>(LOC_Os02g21520) | 5'- TGCTGAGGAAGAACAGAGCC -3'<br>5'- TTCGAGGGTTCAAGCCAAGT -3'   | 58                   |
| OsCHI2<br>(LOC_Os02g53810) | 5'- CCAACTTCAGAGGTGCTCGT -3'<br>5'- CTTTGGGCTCAGCCTTTTGC -3'   | 58                   |
| OsCHI3<br>(LOC_Os03g60509) | 5'- GAGAAGTGGAAATGCCGTGC -3'<br>5'- CCGATGGCCGTGAACTTGAT -3'   | 58                   |
| OsCHI4<br>(LOC_Os06g10210) | 5'- GGCAGACAAATTGGTGCTGTTA -3'<br>5'- AGTGATCCAAGTGAAGCGGG -3' | 58                   |
| OsCHI5<br>(LOC_Os07g38390) | 5'- GTGTATGCGGATGACCACGA -3'<br>5'- CATCCGTATGTCACGCTCCA -3'   | 58                   |
| OsCHI6<br>(LOC_Os11g02440) | 5'- ATGTACTGTGCAGTGGGCA -3'<br>5'- GTCTGTGATGCCATTAGCAAGC -3'  | 58                   |
| OsCHI7<br>(LOC_Os12g02370) | 5'- TGGACAAGTACGAGGATGAGG -3'<br>5'- TGCAATTCCAGGGGTGTTAGG -3' | 58                   |
| OsUBQ5<br>(LOC_Os01g22490) | 5'- CACCCTCGCCGACTACAACA-3'<br>5'- CTTGGTGTACGTCTTCTTCTTGC -3' | 58                   |
| OsUBQ1<br>(LOC_Os03g13170) | 5'- TGATCTGCCGCAAATGCTAT -3'<br>5'- GATTAAACCAGTCCATGAACC -3'  | 58                   |
